# Supplementary material for: Osteopontin Expression in Small Airway Epithelium in Copd is Dependent on Differentiation and Confined to Subsets of Cells
Source: PubMed Central journal article supplement (PMC6820743; doi:10.1038/s41598-019-52208-3), 2019-10-29
Supplement: 41598_2019_52208_MOESM1_ESM.pdf [file 41598_2019_52208_MOESM1_ESM.pdf]

## **SUPPLEMENTARY INFORMATION**

### **Title**

Osteopontin expression in small airway epithelium in COPD is dependent on differentiation and confined to subsets of cells

### **Authors**

Mohamad N. Ali, Michiko Mori, Tinne C.J. Mertens, Premkumar Siddhuraj, Jonas S. Erjefält, Patrik Önerfjord, Pieter S. Hiemstra, Arne Egesten

**Figure S1. Phenotypic characterization of OPN-expressing cells in small airways of a never smoking controls**

Immunofluorescence was used to detect possible co-localization of OPN and mucin 5AC (MUC5AC) in goblet cells (**A**), uteroglobin (UTG) in club cells (**B**), p63 in basal cells (**C**), and forkhead box protein J1 (FOXJ1) in ciliated cells (**D**). In the overlay, a high degree of co-localization was observed for OPN and MUC5AC in goblet cells and UTG in club cells. One representative donor out of three. Scale bars = 100  $\mu$ m.

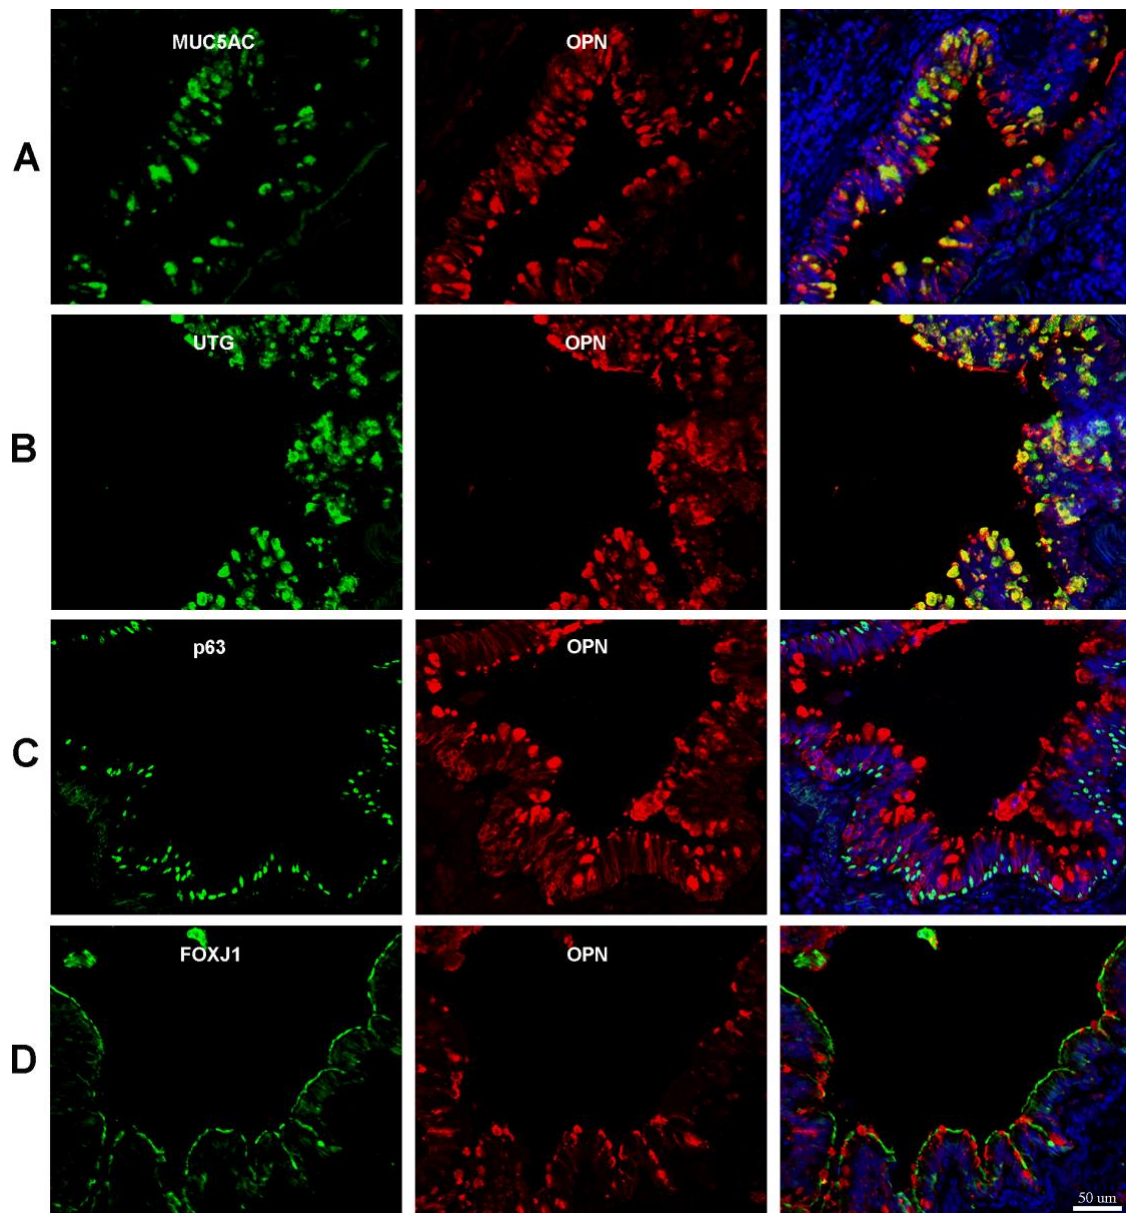

**Table S1. Subject characteristics**

| Characteristic                                                                      | Never-smokers | Smokers w/o COPD | GOLD I COPD   | GOLD II-III* COPD | GOLD IV COPD      |
|-------------------------------------------------------------------------------------|---------------|------------------|---------------|-------------------|-------------------|
| Subjects, n                                                                         | 8             | 6                | 6             | 12                | 9                 |
| Gender, male/female                                                                 | 2/6           | 2/4              | 4/2           | 9/3               | 4/5               |
| Age, years                                                                          | 66 (33-76)#   | 57 (47-68)       | 68 (56-75)    | 66 (53-77)        | 62 (53-66)        |
| Smoking history, pack-years                                                         | 0             | 36 (20-80)       | 39 (25-66)    | 46 (30-65)        | 40 (25-60)        |
| Smoking status, ex-smokers/current                                                  | NA            | 2/4              | 3/3           | 7/5               | 10/0              |
| FEV <sub>1</sub>                                                                    | 2.5 (1.7-5.1) | 2.8 (1.9-3.5)    | 2.9 (1.6-3.2) | 1.8 (1.2-2.9)     | 0.6 (0.4-1.0) □ □ |
| FEV <sub>1</sub> , % of predicted                                                   | 109 (82-141)  | 95 (82-120)      | 86 (80-95)    | 67 (43-78)        | 24 (15-27) □ □ □  |
| FEV <sub>1</sub> /(F)VC, %                                                          | 82 (66-121)   | 76 (71-88)       | 67 (65-70)    | 61 (41-68)        | 32 (20-39)        |
| Inhaled β <sub>2</sub> -agonists                                                    |               |                  |               |                   |                   |
| Short-acting (yes/no/unknown)                                                       | 0/8/0         | 0/6/0            | 1/5/0         | 2/10/0            | 4/4/1‡            |
| Long-acting (yes/no/unknown)                                                        | 0/8/0         | 0/6/0            | 0/6/0         | 0/12/0            | 3/5/1‡            |
| Inhaled anticholinergics                                                            |               |                  |               |                   |                   |
| Short-acting (yes/no/unknown)                                                       | 0/8/0         | 0/6/0            | 1/5/0         | 2/10/0            | 2/6/1‡            |
| Long-acting (yes/no/unknown)                                                        | 0/8/0         | 0/6/0            | 0/6/0         | 0/12/0            | 5/3/1‡            |
| Inhaled short-acting β <sub>2</sub> -agonist plus anticholinergics (yes/no/unknown) | 0/8/0         | 0/6/0            | 0/6/0         | 0/12/0            | 3/5/1‡            |
| Corticosteroids                                                                     |               |                  |               |                   |                   |
| Inhaled (yes/no/unknown)                                                            | 0/8/0         | 0/6/0            | 0/6/0         | 1/11/0            | 2/6/1‡            |
| Oral (yes/no/unknown)                                                               | 0/8/0         | 0/6/0            | 0/6/0         | 0/12/0            | 2/6/1‡            |
| Inhaled long-acting β <sub>2</sub> -agonist plus corticosteroids (yes/no/unknown)   | 0/8/0         | 0/6/0            | 0/6/0         | 1/11/0            | 6/2/1‡            |
| Mucolytics (yes/no/unknown)                                                         | 0/8/0         | 0/6/0            | 2/4/0         | 0/12/0            | 5/3/1‡            |

*Definition of abbreviations:* COPD = chronic obstructive pulmonary disease; FEV<sub>1</sub> = forced expiratory volume in one second; (F)VC = (forced) vital capacity; GOLD = Global Initiative for Chronic Obstructive Lung Disease.

Values are median (range) or n.

\* Two patients with GOLD Stage III COPD (median value of FEV<sub>1</sub>% of predicted, 44.5%; range 43.2-45.9).

# The mean value of the study group is 63 years.

‡ One patient with unknown medical history.

**Table S2. Primer sequences**

| <i>Gene</i>   | <b>Forward Primer</b>            | <b>Reverse Primer</b>          |
|---------------|----------------------------------|--------------------------------|
| <i>OPN</i>    | 5'-GGACTCCATTGACTCGAACGACTCTG-3' | 5'-AACCACACTATCACCTCGGCCATC-3' |
| <i>FOXJ1</i>  | 5'-GGAGGGGACGTAATCCCTA-3'        | 5'-TTGGTCCCAGTAGTTCCAGC-3'     |
| <i>MUC5AC</i> | 5'-ATTTTTTCCCCACTCCTGATG-3'      | 5'-AAGACAACCCACTCCCAACC-3'     |
| <i>p63</i>    | 5'-CCACCTGGACGTATTCCACTG-3'      | 5'-TCGAATCAAATGACTAGGAGGGG-3'  |
| <i>UTG</i>    | 5'-CCCTGGTCACACTGGCTCTCTGC-3'    | 5'-CCCCTGCCTCCCTCATGTCTTG-3'   |
| <i>RPL13A</i> | 5'-AAGGTGGTGGTCGTACGCTGTG-3'     | 5'-CGGGAAGGGTTGGTGTTCATCC-3'   |

OPN, osteopontin; FOXJ1, forkhead box protein J1; MUC5AC, mucin 5AC; p63, tumor protein p63; UTG, uteroglobin; RPL13A, ribosomal protein L13A.
